# Supplementary material
Source: publisher figshare collection journal article supplement (https://acs.figshare.com/ndownloader/files/20136350)
Supplement: Supplementary file 1 [file 20136350]

**Effects on High Concentration LiPF<sub>6</sub> Based Carbonate Ester Electrolyte for the  
Electrochemical Performance of High Voltage Layered LiN<sub>i0.6</sub>Co<sub>0.2</sub>Mn<sub>0.2</sub>O<sub>2</sub>  
Cathode**

Qi Liu<sup>a</sup>, Hongliang Xu<sup>a</sup>, Feng Wu<sup>a</sup>, Daobin Mu<sup>a\*</sup>, Lili Shi<sup>a\*</sup>, Lei Wang, Jiaying Bi,  
Borong Wu<sup>a</sup>

<sup>a</sup> Beijing Key Laboratory of Environment Science and Engineering, School of  
Material Science and Engineering, Collaborative Innovation Center of Electric  
Vehicles in Beijing, Beijing Institute of Technology, Beijing 100081, China

\*corresponding author:

E-mail: [mudb@bit.edu.cn](mailto:mudb@bit.edu.cn).

E-mail: [shilili1307@163.com](mailto:shilili1307@163.com)



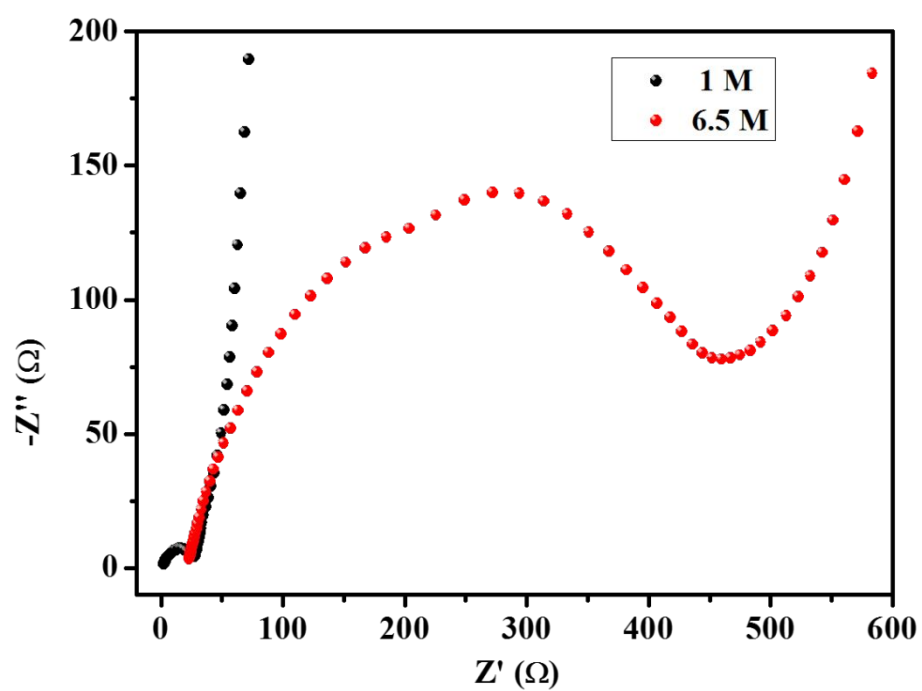

**Figure. S1** Impedance plots of the  $\text{LiNi}_{0.6}\text{Co}_{0.2}\text{Mn}_{0.2}\text{O}_2/\text{electrolyte}/\text{Li}$  cell with the 1M diluted electrolyte and 6.5 M high concentration electrolyte after the third cycle.

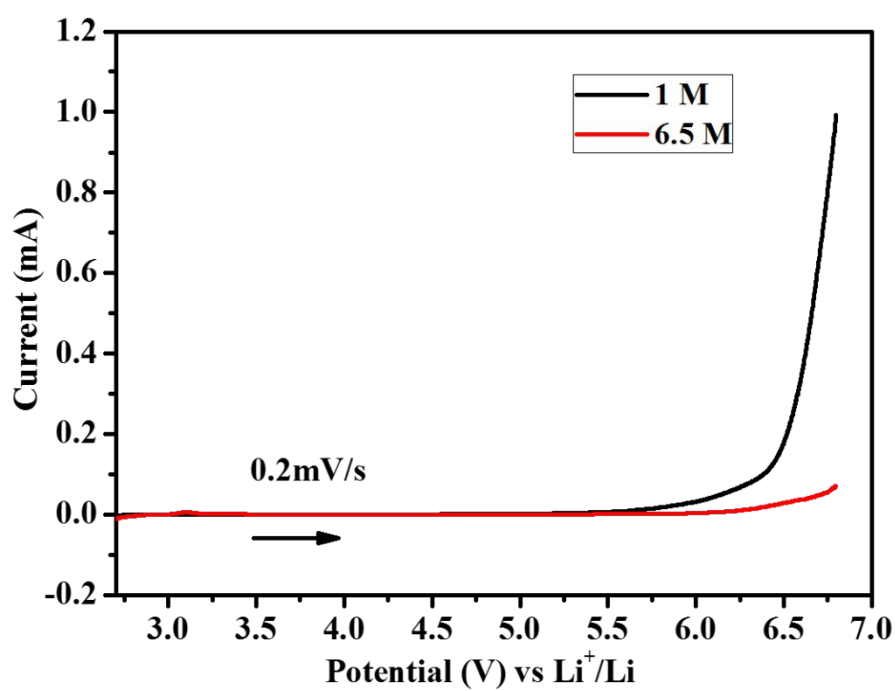

**Figure. S2** Current-potential curve of Li/electrolyte/Pt cell: Pt as the working electrode and Li as the counter and the reference electrode, at a scan rate of 0.2 mV s<sup>-1</sup> from 2.7 to 6.8V.

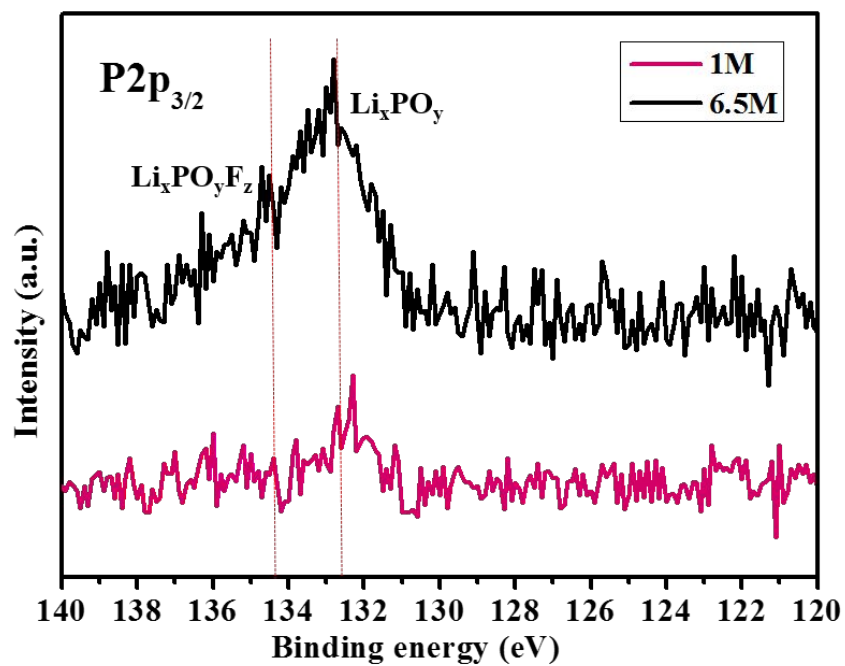

**Figure. S3** XPS analyses on SEI formed on LiNi<sub>0.6</sub>Co<sub>0.2</sub>Mn<sub>0.2</sub>O<sub>2</sub> cathode surfaces in 1M and 6.5M EC/DMC-LiPF<sub>6</sub> electrolytes, P2p<sub>3/2</sub> spectra are presented as indicated.

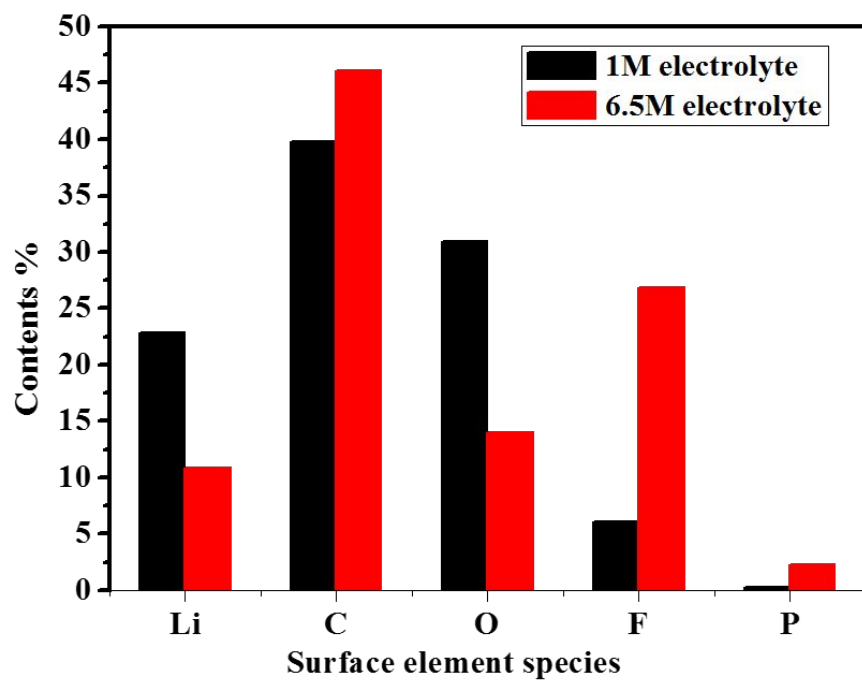

**Figure. S4** The surface element distribution of LiNi<sub>0.6</sub>Co<sub>0.2</sub>Mn<sub>0.2</sub>O<sub>2</sub> cathode by the XPS analysis.
